# Supplementary material for: Cellulose-Based Scaffolds: A Comparative Study for Potential Application in Articular Cartilage
Source: MDPI journal article supplement (doi:10.3390/polym15030781), 2023-02-03
Supplement: s1 [file s1]

## Supplementary Material

Table S1- Cytocompatibility assessed by Presto Blue™ viability assay with hDPSCs. Corrected absorbance results are presented in Mean  $\pm$  SEM.

| Timepoint<br>Scaffold | 24h               | 72h                | 120h              | 168h              |
|-----------------------|-------------------|--------------------|-------------------|-------------------|
| PCL                   | 0.025 $\pm$ 0.005 | 0.0378 $\pm$ 0.003 | 0.040 $\pm$ 0.004 | 0.079 $\pm$ 0.044 |
| McC1%                 | 0.012 $\pm$ 0.001 | 0.028 $\pm$ 0.003  | 0.027 $\pm$ 0.002 | 0.054 $\pm$ 0.005 |
| McC2%                 | 0.010 $\pm$ 0.001 | 0.021 $\pm$ 0.000  | 0.017 $\pm$ 0.002 | 0.040 $\pm$ 0.005 |
| McC3%                 | 0.023 $\pm$ 0.001 | 0.047 $\pm$ 0.002  | 0.052 $\pm$ 0.002 | 0.067 $\pm$ 0.002 |
| MC1%                  | 0.016 $\pm$ 0.002 | 0.028 $\pm$ 0.002  | 0.030 $\pm$ 0.003 | 0.042 $\pm$ 0.010 |
| MC2%                  | 0.020 $\pm$ 0.004 | 0.023 $\pm$ 0.002  | 0.033 $\pm$ 0.004 | 0.050 $\pm$ 0.005 |
| MC3%                  | 0.025 $\pm$ 0.001 | 0.029 $\pm$ 0.001  | 0.049 $\pm$ 0.005 | 0.056 $\pm$ 0.004 |
| CcC1%                 | 0.042 $\pm$ 0.005 | 0.0480 $\pm$ 0.007 | 0.038 $\pm$ 0.008 | 0.066 $\pm$ 0.004 |
| CcC2%                 | 0.022 $\pm$ 0.001 | 0.026 $\pm$ 0.001  | 0.031 $\pm$ 0.002 | 0.044 $\pm$ 0.004 |
| CcC3%                 | 0.019 $\pm$ 0.001 | 0.031 $\pm$ 0.002  | 0.047 $\pm$ 0.003 | 0.051 $\pm$ 0.004 |
| Cells                 | 0.021 $\pm$ 0.001 | 0.031 $\pm$ 0.001  | 0.036 $\pm$ 0.001 | 0.055 $\pm$ 0.003 |

Table S2- Percentage of inhibition of cell viability of each scaffold in contact with the hDPSCs. After normalization of the Control group (100%), results are presented as Mean  $\pm$  SEM for the percentage of viability inhibition, comparing to the control group.

| Timepoint<br>Scaffold | 24h                 | 72h                | 120h               | 168h               |
|-----------------------|---------------------|--------------------|--------------------|--------------------|
| PCL                   | 28.84 $\pm$ 11.70   | -7.61 $\pm$ 6.62   | -10.36 $\pm$ 10.75 | -94.50 $\pm$ 18.14 |
| McC1%                 | 43.53 $\pm$ 4.23    | 13.39 $\pm$ 8.70   | 13.22 $\pm$ 7.30   | 4.61 $\pm$ 0.22    |
| McC2%                 | 46.75 $\pm$ 2.32    | 31.81 $\pm$ 1.05   | 21.93 $\pm$ 1.61   | 31.19 $\pm$ 0.25   |
| McC3%                 | -12.55 $\pm$ 5.25   | -18.11 $\pm$ 0.00  | -30.11 $\pm$ 2.31  | -71.84 $\pm$ 11.18 |
| MC1%                  | 24.16 $\pm$ 7.37    | 12.34 $\pm$ 5.21   | 15.43 $\pm$ 9.58   | -70.39 $\pm$ 17.35 |
| MC2%                  | 5.20 $\pm$ 20.91    | 7.09 $\pm$ 4.23    | 8.46 $\pm$ 10.83   | -41.92 $\pm$ 17.08 |
| MC3%                  | -20.61 $\pm$ 3.48   | -10.24 $\pm$ 0.00  | -35.46 $\pm$ 14.51 | -63.77 $\pm$ 16.09 |
| CcC1%                 | -104.10 $\pm$ 24.49 | -51.44 $\pm$ 23.27 | -71.47 $\pm$ 15.18 | -69.96 $\pm$ 8.29  |
| CcC2%                 | -7.71 $\pm$ 4.44    | -24.41 $\pm$ 13.84 | -28.03 $\pm$ 8.98  | -18.29 $\pm$ 22.68 |
| CcC3%                 | 6.82 $\pm$ 6.61     | 2.62 $\pm$ 5.79    | -30.58 $\pm$ 8.22  | -19.86 $\pm$ 4.20  |

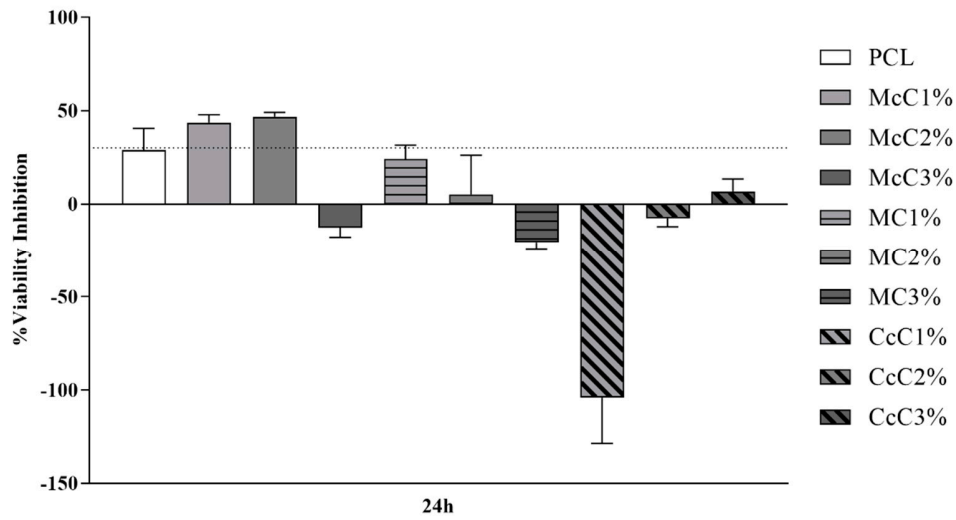

Figure S1- Percentage of inhibition of cell viability of each scaffold in contact with the hDPSCs at 24h. The dashed line represents the 30% inhibition limit, above which the effect is considered cytotoxic according to the ISO 10993-5:2009 guidelines.

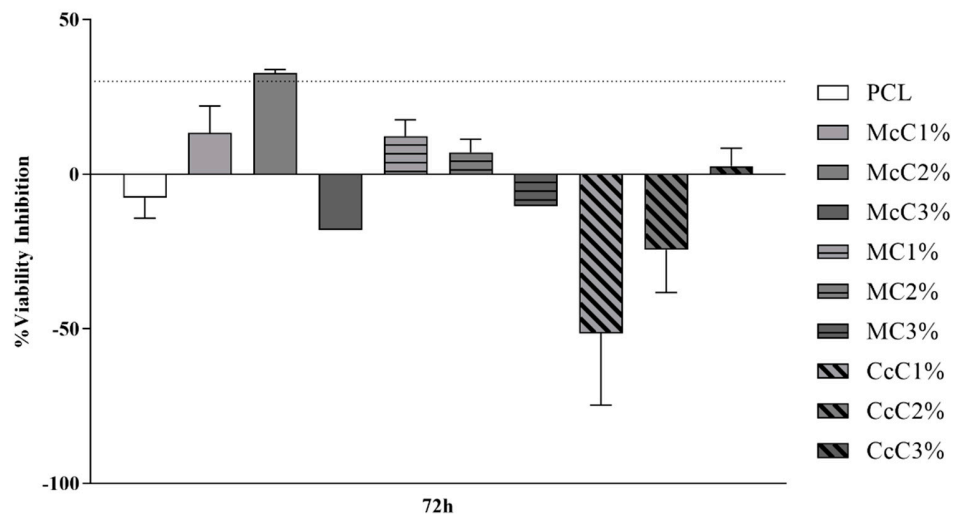

Figure S2- Percentage of inhibition of cell viability of each scaffold in contact with the hDPSCs at 72h. The dashed line represents the 30% inhibition limit, above which the effect is considered cytotoxic according to the ISO 10993-5:2009 guidelines.

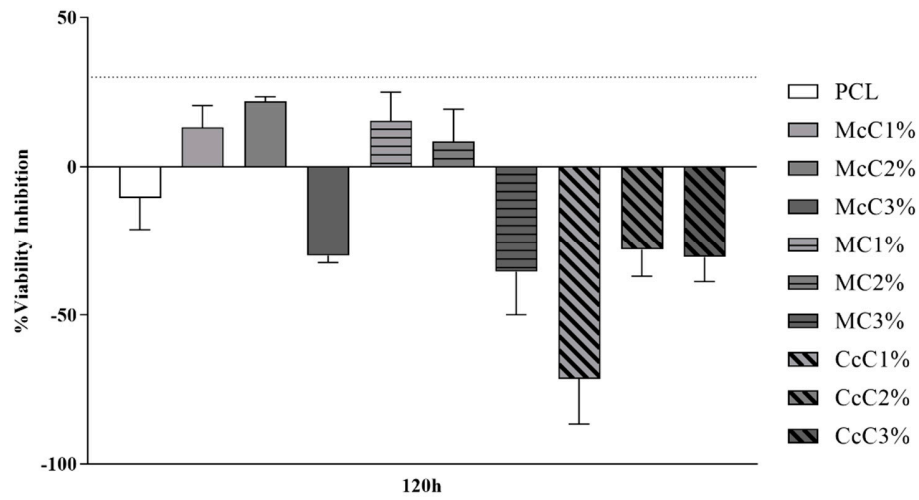

Figure S3- Percentage of inhibition of cell viability of each scaffold in contact with the hDPSCs at 120h. The dashed line represents the 30% inhibition limit, above which the effect is considered cytotoxic according to the ISO 10993-5:2009 guidelines.

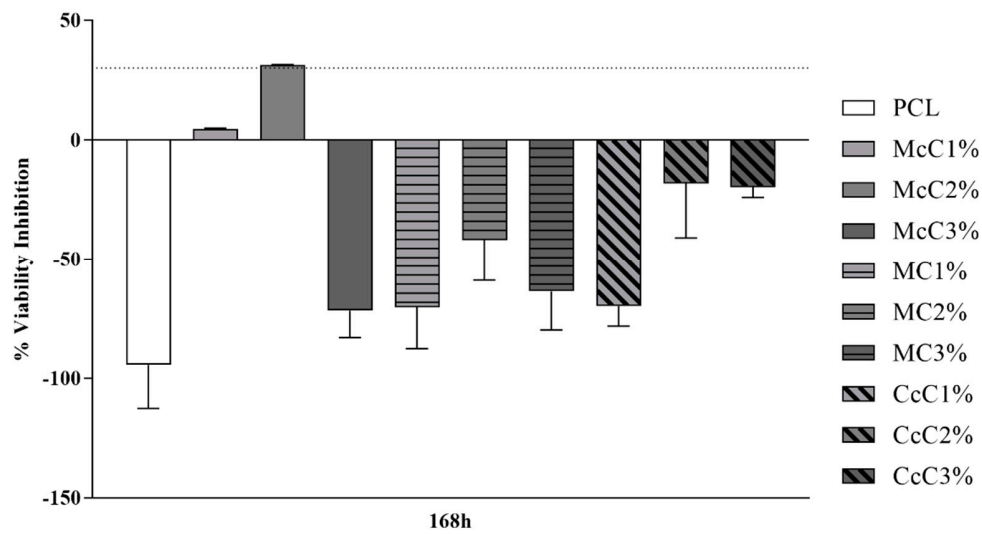

Figure S4- Percentage of inhibition of cell viability of each scaffold in contact with the hDPSCs at 168h. The dashed line represents the 30% inhibition limit, above which the effect is considered cytotoxic according to the ISO 10993-5:2009 guidelines.
